# Supplementary material
Source: PubMed Central journal article supplement (PMC2877634)
Supplement: NIHMS188446-supplement-Suppl_tables.pdf [file NIHMS188446-supplement-Suppl_tables.pdf]

Supplementary Table: Predictor Group Rankings on Combined Full-Model, High-Accuracy Scores

| group ID | group name          | GDT-HA |       |        | 6full+GDT-HA |       | 6full |        | GDC-sc |     |       | MCRS   |     |       | HBmc   |     |       | HBSc   |     |       | corRot |     |       | MPscore |     |       |        |
|----------|---------------------|--------|-------|--------|--------------|-------|-------|--------|--------|-----|-------|--------|-----|-------|--------|-----|-------|--------|-----|-------|--------|-----|-------|---------|-----|-------|--------|
|          |                     | n      | raw   | Z      | rank         | Z     | rank  | Z      | rank   | n   | raw   | Z       | n   | raw   | Z      |
| 489      | DBAKER              | 50     | 56.95 | 0.752  | 7            | 0.940 | 1     | 1.128  | 2      | 37  | 36.37 | 0.529  | 36  | 88.22 | 0.713  | 35  | 0.635 | 0.964  | 35  | 0.161 | 0.977  | 35  | 0.423 | 1.015   | 36  | 1.921 | 2.569  |
| 293s     | LEE-SERVER          | 86     | 63.56 | 0.741  | 8            | 0.854 | 2     | 0.966  | 3      | 86  | 47.31 | 1.018  | 69  | 90.59 | 0.672  | 69  | 0.711 | 0.641  | 69  | 0.249 | 1.006  | 69  | 0.488 | 1.382   | 69  | 2.741 | 1.077  |
| 453      | MULTICOM            | 129    | 61.85 | 0.901  | 1            | 0.847 | 3     | 0.794  | 5      | 116 | 44.05 | 0.911  | 101 | 87.28 | 0.607  | 100 | 0.692 | 0.811  | 100 | 0.176 | 0.396  | 100 | 0.455 | 1.145   | 101 | 2.835 | 0.892  |
| 407      | LEE                 | 127    | 60.77 | 0.715  | 11           | 0.829 | 4     | 0.942  | 4      | 114 | 44.82 | 1.048  | 99  | 91.00 | 0.725  | 98  | 0.682 | 0.693  | 98  | 0.215 | 0.844  | 98  | 0.472 | 1.345   | 99  | 2.788 | 1.000  |
| 46       | SAM-T08-human       | 49     | 55.87 | 0.738  | 9            | 0.714 | 5     | 0.690  | 9      | 36  | 35.33 | 0.550  | 37  | 80.75 | 0.458  | 36  | 0.644 | 1.048  | 36  | 0.143 | 0.699  | 36  | 0.391 | 0.714   | 37  | 2.966 | 0.670  |
| 379      | McGuffin            | 125    | 61.59 | 0.833  | 3            | 0.668 | 6     | 0.503  | 16     | 114 | 43.51 | 0.729  | 98  | 71.26 | 0.056  | 97  | 0.685 | 0.660  | 97  | 0.188 | 0.437  | 97  | 0.425 | 0.697   | 98  | 3.050 | 0.436  |
| 196      | ZicoFullSTP         | 129    | 61.41 | 0.836  | 2            | 0.619 | 7     | 0.403  | 23     | 116 | 42.18 | 0.528  | 102 | 83.45 | 0.473  | 101 | 0.667 | 0.602  | 101 | 0.174 | 0.250  | 101 | 0.390 | 0.230   | 102 | 3.102 | 0.336  |
| 138      | ZicoFullSTPFullData | 128    | 61.50 | 0.825  | 4            | 0.615 | 8     | 0.404  | 22     | 115 | 42.52 | 0.545  | 101 | 83.27 | 0.468  | 100 | 0.669 | 0.601  | 100 | 0.175 | 0.227  | 99  | 0.394 | 0.269   | 101 | 3.108 | 0.315  |
| 299      | Zico                | 130    | 61.07 | 0.805  | 6            | 0.593 | 9     | 0.382  | 26     | 117 | 42.02 | 0.517  | 101 | 81.97 | 0.422  | 100 | 0.667 | 0.593  | 100 | 0.174 | 0.218  | 100 | 0.390 | 0.235   | 101 | 3.119 | 0.306  |
| 310      | mufold              | 51     | 56.26 | 0.737  | 10           | 0.585 | 10    | 0.434  | 21     | 39  | 36.23 | 0.537  | 35  | 69.78 | 0.085  | 34  | 0.648 | 0.868  | 34  | 0.107 | -0.064 | 33  | 0.386 | 0.522   | 35  | 2.962 | 0.654  |
| 283      | IBT_LT              | 51     | 54.38 | 0.627  | 15           | 0.583 | 11    | 0.540  | 15     | 38  | 37.18 | 0.968  | 37  | 74.75 | 0.258  | 36  | 0.594 | 0.565  | 36  | 0.126 | 0.225  | 36  | 0.398 | 0.783   | 37  | 3.084 | 0.443  |
| 178      | Bates_BMM           | 48     | 54.26 | 0.432  | 21           | 0.581 | 12    | 0.729  | 8      | 35  | 35.75 | 0.536  | 34  | 86.99 | 0.646  | 33  | 0.620 | 0.704  | 33  | 0.126 | 0.172  | 33  | 0.429 | 1.179   | 34  | 2.711 | 1.138  |
| 147s     | YASARA              | 73     | 63.14 | 0.012  | 62           | 0.576 | 13    | 1.140  | 1      | 71  | 47.56 | 0.427  | 58  | 95.97 | 0.791  | 58  | 0.758 | 0.639  | 58  | 0.251 | 0.724  | 57  | 0.462 | 0.793   | 58  | 1.496 | 3.463  |
| 71       | Zhang               | 51     | 55.89 | 0.811  | 5            | 0.565 | 14    | 0.318  | 32     | 38  | 36.23 | 0.713  | 38  | 52.40 | -0.469 | 37  | 0.618 | 0.789  | 37  | 0.102 | -0.021 | 37  | 0.409 | 0.881   | 38  | 3.309 | 0.018  |
| 81       | Chicken_George      | 46     | 55.11 | 0.563  | 16           | 0.508 | 15    | 0.454  | 20     | 33  | 36.34 | 0.581  | 34  | 60.58 | -0.252 | 33  | 0.605 | 0.451  | 33  | 0.121 | 0.125  | 33  | 0.425 | 1.092   | 34  | 2.906 | 0.726  |
| 485      | Ozkan-Shell         | 29     | 58.08 | 0.360  | 26           | 0.487 | 16    | 0.615  | 10     | 17  | 39.21 | 0.371  | 21  | 67.03 | -0.170 | 21  | 0.630 | 0.292  | 21  | 0.150 | 0.349  | 20  | 0.386 | 0.159   | 21  | 1.705 | 2.687  |
| 34       | SAMUDRALA           | 103    | 60.54 | 0.496  | 17           | 0.429 | 17    | 0.362  | 30     | 95  | 43.45 | 0.505  | 81  | 78.22 | 0.285  | 81  | 0.648 | 0.281  | 81  | 0.169 | 0.115  | 80  | 0.413 | 0.431   | 81  | 2.965 | 0.554  |
| 425s     | BAKER-ROBETTA       | 132    | 57.03 | 0.088  | 52           | 0.416 | 18    | 0.744  | 7      | 118 | 41.82 | 0.474  | 102 | 88.50 | 0.636  | 101 | 0.645 | 0.422  | 101 | 0.199 | 0.690  | 101 | 0.450 | 1.058   | 102 | 2.675 | 1.183  |
| 426s     | Zhang-Server        | 131    | 60.57 | 0.654  | 12           | 0.406 | 19    | 0.159  | 41     | 117 | 42.71 | 0.618  | 101 | 41.66 | -0.945 | 100 | 0.664 | 0.537  | 100 | 0.146 | -0.116 | 100 | 0.436 | 0.874   | 101 | 3.280 | -0.014 |
| 434      | fams-ace2           | 130    | 60.40 | 0.640  | 14           | 0.371 | 20    | 0.102  | 49     | 117 | 42.15 | 0.478  | 101 | 68.08 | -0.047 | 100 | 0.585 | -0.168 | 100 | 0.145 | -0.195 | 100 | 0.411 | 0.510   | 101 | 3.253 | 0.035  |
| 256s     | SAM-T08-server      | 125    | 58.07 | 0.157  | 44           | 0.366 | 21    | 0.575  | 11     | 112 | 42.80 | 0.578  | 100 | 74.19 | 0.151  | 99  | 0.682 | 0.700  | 99  | 0.187 | 0.362  | 99  | 0.451 | 1.040   | 100 | 2.962 | 0.618  |
| 442      | LevittGroup         | 46     | 53.48 | 0.200  | 39           | 0.350 | 22    | 0.499  | 17     | 33  | 37.59 | 0.620  | 34  | 75.00 | 0.248  | 33  | 0.665 | 1.095  | 33  | 0.155 | 0.709  | 33  | 0.415 | 0.896   | 34  | 3.580 | -0.573 |
| 174s     | COMA-M              | 126    | 58.68 | 0.216  | 37           | 0.342 | 23    | 0.468  | 19     | 112 | 42.57 | 0.472  | 96  | 84.20 | 0.481  | 95  | 0.631 | 0.169  | 95  | 0.164 | 0.079  | 95  | 0.449 | 0.955   | 96  | 2.942 | 0.651  |
| 200      | Elofsson            | 49     | 54.83 | 0.471  | 18           | 0.308 | 24    | 0.145  | 43     | 36  | 35.83 | 0.361  | 37  | 83.92 | 0.574  | 36  | 0.595 | 0.434  | 36  | 0.116 | -0.003 | 36  | 0.316 | -0.390  | 37  | 3.383 | -0.108 |
| 253      | SHORTLE             | 54     | 57.76 | 0.047  | 56           | 0.302 | 25    | 0.558  | 12     | 43  | 43.63 | 0.829  | 46  | 76.68 | 0.129  | 45  | 0.713 | 0.805  | 45  | 0.159 | 0.020  | 46  | 0.409 | 0.481   | 46  | 2.656 | 1.085  |
| 069s     | MULTICOM-CMFR       | 128    | 58.35 | 0.188  | 41           | 0.294 | 26    | 0.399  | 24     | 114 | 40.93 | 0.200  | 98  | 85.17 | 0.508  | 97  | 0.639 | 0.235  | 97  | 0.174 | 0.179  | 97  | 0.428 | 0.724   | 98  | 2.992 | 0.546  |
| 436s     | Pcons_dot_net       | 123    | 57.79 | 0.105  | 51           | 0.293 | 27    | 0.481  | 18     | 109 | 42.28 | 0.471  | 99  | 86.04 | 0.555  | 98  | 0.626 | 0.208  | 98  | 0.165 | 0.108  | 98  | 0.432 | 0.789   | 99  | 2.893 | 0.755  |
| 020s     | MULTICOM-CLUSTER    | 130    | 59.89 | 0.456  | 19           | 0.283 | 28    | 0.111  | 48     | 116 | 40.40 | 0.098  | 100 | 85.18 | 0.523  | 99  | 0.646 | 0.319  | 99  | 0.183 | 0.334  | 99  | 0.347 | -0.363  | 100 | 3.378 | -0.247 |
| 429s     | Pcons_multi         | 124    | 58.15 | 0.166  | 43           | 0.281 | 29    | 0.396  | 25     | 112 | 41.49 | 0.318  | 99  | 80.28 | 0.361  | 98  | 0.625 | 0.142  | 98  | 0.164 | 0.048  | 98  | 0.442 | 0.918   | 99  | 2.982 | 0.590  |
| 013s     | MULTICOM-REFINE     | 129    | 59.39 | 0.361  | 25           | 0.279 | 30    | 0.198  | 39     | 115 | 41.18 | 0.267  | 100 | 87.75 | 0.604  | 99  | 0.646 | 0.333  | 99  | 0.169 | 0.129  | 99  | 0.350 | -0.311  | 100 | 3.176 | 0.165  |
| 198      | fais@hgc            | 43     | 52.44 | 0.313  | 32           | 0.262 | 31    | 0.211  | 36     | 30  | 34.71 | 0.414  | 31  | 52.52 | -0.465 | 30  | 0.579 | 0.455  | 30  | 0.105 | -0.111 | 31  | 0.414 | 0.926   | 31  | 3.328 | 0.048  |
| 443s     | MUProt              | 128    | 58.96 | 0.261  | 36           | 0.247 | 32    | 0.232  | 35     | 114 | 41.15 | 0.238  | 99  | 88.75 | 0.642  | 98  | 0.646 | 0.330  | 98  | 0.171 | 0.135  | 98  | 0.362 | -0.155  | 99  | 3.166 | 0.202  |
| 202      | Sternberg           | 48     | 53.99 | 0.352  | 27           | 0.212 | 33    | 0.072  | 52     | 35  | 34.89 | 0.267  | 35  | 44.16 | -0.746 | 34  | 0.558 | 0.198  | 34  | 0.104 | -0.119 | 33  | 0.397 | 0.655   | 35  | 3.206 | 0.176  |
| 438s     | RAPTOR              | 131    | 59.19 | 0.401  | 22           | 0.199 | 34    | -0.002 | 61     | 117 | 39.51 | -0.026 | 101 | 81.83 | 0.427  | 100 | 0.646 | 0.400  | 100 | 0.165 | 0.048  | 100 | 0.330 | -0.608  | 101 | 3.392 | -0.256 |
| 371      | GeneSilico          | 50     | 54.38 | 0.439  | 20           | 0.199 | 35    | -0.042 | 69     | 37  | 34.42 | 0.218  | 35  | 47.31 | -0.663 | 34  | 0.600 | 0.476  | 34  | 0.128 | 0.302  | 34  | 0.350 | 0.025   | 35  | 3.616 | -0.607 |
| 266      | FAMS-multi          | 131    | 58.69 | 0.320  | 31           | 0.188 | 36    | 0.057  | 55     | 118 | 42.12 | 0.516  | 102 | 69.89 | 0.029  | 101 | 0.593 | -0.058 | 101 | 0.177 | 0.246  | 101 | 0.394 | 0.286   | 102 | 3.606 | -0.679 |
| 012s     | HHpred5             | 117    | 59.49 | 0.288  | 33           | 0.182 | 37    | 0.076  | 51     | 105 | 40.26 | -0.021 | 93  | 86.56 | 0.555  | 92  | 0.655 | 0.404  | 92  | 0.180 | 0.193  | 93  | 0.337 | -0.513  | 93  | 3.328 | -0.163 |
| 131s     | MULTICOM-RANK       | 127    | 58.91 | 0.274  | 35           | 0.171 | 38    | 0.068  | 53     | 113 | 39.90 | -0.014 | 99  | 85.34 | 0.524  | 98  | 0.640 | 0.282  | 98  | 0.177 | 0.247  | 98  | 0.347 | -0.376  | 99  | 3.378 | -0.253 |
| 477s     | SAM-T06-server      | 125    | 56.49 | -0.202 | 79           | 0.169 | 39    | 0.540  | 14     | 112 | 42.86 | 0.508  | 99  | 81.76 | 0.390  | 98  | 0.653 | 0.414  | 98  | 0.180 | 0.286  | 98  | 0.432 | 0.776   | 99  | 2.834 | 0.868  |
| 234s     | COMA                | 128    | 57.07 | -0.079 | 71           | 0.147 | 40    | 0.374  | 28     | 114 | 41.11 | 0.185  | 98  | 86.06 | 0.546  | 97  | 0.622 | 0.111  | 97  | 0.151 | -0.114 | 96  | 0.438 | 0.838   | 98  | 2.937 | 0.675  |
| 143s     | Pcons_local         | 117    | 56.66 | -0.057 | 69           | 0.144 | 41    | 0.345  | 31     | 107 | 42.20 | 0.443  | 96  | 85.08 | 0.527  | 95  | 0.589 | -0.091 | 95  | 0.152 | -0.090 | 95  | 0.417 | 0.619   | 96  | 2.958 | 0.661  |
| 57       | TASSER              | 130    | 60.66 | 0.641  | 13           | 0.141 | 42    | -0.359 | 102    | 117 | 41.78 | 0.413  | 101 | 2.62  | -2.376 | 100 | 0.565 | -0.329 | 100 | 0.135 | -0.272 | 100 | 0.421 | 0.669   | 101 | 3.397 | -0.262 |
| 322s     | Phyre_de_novo       | 128    | 59.52 | 0.350  | 28           | 0.122 | 43    | -0.106 | 77     | 114 | 40.74 | 0.170  | 97  | 38.89 | -1.044 | 96  | 0.598 | -0.049 | 96  | 0.123 | -0.516 | 96  | 0.428 | 0.701   | 97  | 3.208 | 0.105  |
| 149      | A-TASSER            | 129    | 58.10 | 0.196  | 40           | 0.120 | 44    | 0.044  | 57     | 116 | 39.59 | 0.005  | 101 | 68.84 | -0.028 | 100 | 0.581 | -0.191 | 100 | 0.109 | -0.649 | 100 | 0.362 | -0.112  | 101 | 2.686 | 1.236  |
| 124      | POEMQA              | 126    | 58.41 | 0.369  | 24           | 0.109 | 45    | -0.150 | 81     | 113 | 40.68 | 0.220  | 98  | 86.75 | 0.575  | 97  | 0.694 | 0.749  | 97  | 0.116 | -0.622 | 97  | 0.311 | -0.865  | 98  | 3.729 | -0.957 |
| 284      | Hao_Kihara          | 44     | 52.11 | -0.026 | 65           | 0.091 | 46    | 0.209  | 37     | 32  | 34.93 | 0.230  | 33  | 82.91 | 0.533  | 32  | 0.512 | -0.201 | 32  | 0.109 | -0.160 | 32  | 0.370 | 0.377   | 33  | 3.071 | 0.472  |
| 408s     | MUSTER              | 127    | 58.11 | 0.201  | 38           | 0.084 | 47    | -0.033 | 67     | 114 | 38.79 | -0.191 | 101 | 83.05 | 0.459  | 100 | 0.626 | 0.222  | 100 | 0.174 | 0.154  | 100 | 0.331 | -0.556  | 101 | 3.402 | -0.286 |
| 235s     | Phyre2              | 129    | 57.35 | 0.017  |              |       |       |        |        |     |       |        |     |       |        |     |       |        |     |       |        |     |       |         |     |       |        |

| group ID | group name           | GDT-HA |       |        | 6full+GDT-HA |        |     | 6full  |      |     | GDC-sc |          |      | MCRS  |        |     | HBmc  |        |     | HBsc  |        |     | corRot |        |     | MPscore |        |   |
|----------|----------------------|--------|-------|--------|--------------|--------|-----|--------|------|-----|--------|----------|------|-------|--------|-----|-------|--------|-----|-------|--------|-----|--------|--------|-----|---------|--------|---|
|          |                      | n      | raw   | Z      | rank         | n      | raw | Z      | rank | n   | raw    | Z        | rank | n     | raw    | Z   | n     | raw    | Z   | n     | raw    | Z   | n      | raw    | Z   | n       | raw    | Z |
| 048s     | PS2-server           | 128    | 58.29 | 0.185  | 42           | 0.071  | 50  | -0.044 | 70   | 114 | 39.45  | -0.116   | 98   | 85.00 | 0.508  | 97  | 0.648 | 0.302  | 97  | 0.165 | -0.043 | 97  | 0.319  | -0.740 | 98  | 3.349   | -0.174 |   |
| 100s     | nFOLD3               | 75     | 55.79 | 0.038  | 59           | 0.068  | 51  | 0.099  | 50   | 66  | 37.24  | -0.149   | 55   | 86.78 | 0.595  | 54  | 0.597 | 0.088  | 54  | 0.168 | 0.233  | 55  | 0.349  | -0.273 | 55  | 3.239   | 0.099  |   |
| 116s     | fais-server          | 122    | 58.55 | 0.142  | 48           | 0.064  | 52  | -0.014 | 63   | 109 | 39.74  | -0.132   | 96   | 86.03 | 0.550  | 95  | 0.635 | 0.194  | 95  | 0.164 | -0.046 | 96  | 0.339  | -0.489 | 96  | 3.335   | -0.160 |   |
| 270s     | Phragment            | 123    | 57.29 | -0.040 | 67           | 0.064  | 53  | 0.168  | 40   | 113 | 39.67  | -0.027   | 95   | 72.02 | 0.050  | 94  | 0.628 | 0.156  | 94  | 0.150 | -0.189 | 94  | 0.436  | 0.803  | 95  | 3.151   | 0.213  |   |
| 351s     | FALCON               | 51     | 60.05 | 0.150  | 46           | 0.055  | 54  | -0.040 | 68   | 49  | 41.22  | -0.169   | 40   | 84.72 | 0.464  | 40  | 0.660 | 0.162  | 40  | 0.189 | 0.075  | 39  | 0.342  | -0.670 | 40  | 3.296   | -0.099 |   |
| 220s     | FALCON_CONSENSUS     | 51     | 59.17 | 0.132  | 49           | 0.054  | 55  | -0.023 | 64   | 49  | 40.82  | -0.171   | 37   | 84.41 | 0.509  | 37  | 0.643 | 0.170  | 37  | 0.188 | 0.146  | 37  | 0.338  | -0.613 | 37  | 3.389   | -0.177 |   |
| 279s     | GS-KudlatyPred       | 128    | 57.00 | -0.024 | 64           | 0.053  | 56  | 0.131  | 44   | 114 | 39.14  | -0.094   | 99   | 85.87 | 0.549  | 98  | 0.633 | 0.260  | 98  | 0.160 | -0.020 | 98  | 0.365  | -0.129 | 99  | 3.155   | 0.220  |   |
| 415s     | keasar-server        | 117    | 58.70 | 0.155  | 45           | 0.033  | 57  | -0.088 | 76   | 104 | 42.75  | 0.468    | 92   | 0.00  | -2.480 | 91  | 0.685 | 0.696  | 91  | 0.216 | 0.805  | 90  | 0.421  | 0.635  | 92  | 3.587   | -0.655 |   |
| 282      | 3DShot1              | 121    | 58.28 | 0.337  | 29           | 0.027  | 58  | -0.283 | 96   | 108 | 39.31  | 0.045    | 93   | 52.93 | -0.543 | 92  | 0.617 | 0.132  | 92  | 0.133 | -0.324 | 92  | 0.367  | -0.067 | 93  | 3.727   | -0.940 |   |
| 114      | keasar               | 45     | 52.37 | -0.246 | 82           | 0.021  | 59  | 0.288  | 34   | 32  | 34.85  | 0.071    | 33   | 29.54 | -1.395 | 32  | 0.667 | 0.952  | 32  | 0.139 | 0.296  | 32  | 0.406  | 0.738  | 33  | 2.720   | 1.063  |   |
| 419      | 3DShotMQ             | 119    | 57.90 | 0.322  | 30           | 0.016  | 60  | -0.290 | 97   | 106 | 39.72  | 0.122    | 93   | 50.08 | -0.651 | 92  | 0.627 | 0.230  | 92  | 0.129 | -0.348 | 92  | 0.363  | -0.124 | 93  | 3.745   | -0.971 |   |
| 353      | CBSU                 | 29     | 53.37 | 0.142  | 47           | 0.010  | 61  | -0.122 | 78   | 23  | 34.49  | -0.271   | 21   | 83.70 | 0.531  | 21  | 0.574 | -0.076 | 21  | 0.139 | -0.195 | 21  | 0.300  | -0.817 | 21  | 3.293   | 0.097  |   |
| 140s     | FAMSD                | 129    | 57.67 | 0.038  | 58           | 0.007  | 62  | -0.024 | 65   | 116 | 41.67  | 0.320    | 99   | 75.58 | 0.199  | 98  | 0.578 | -0.248 | 98  | 0.173 | 0.152  | 98  | 0.383  | 0.122  | 99  | 3.591   | -0.687 |   |
| 122s     | HHpred4              | 124    | 57.38 | -0.039 | 66           | -0.002 | 63  | 0.035  | 59   | 111 | 38.69  | -0.313   | 98   | 89.42 | 0.658  | 97  | 0.637 | 0.291  | 97  | 0.174 | 0.135  | 98  | 0.333  | -0.539 | 98  | 3.272   | -0.020 |   |
| 182s     | METATASSER           | 89     | 59.76 | 0.281  | 34           | -0.015 | 64  | -0.312 | 98   | 82  | 41.73  | 0.367    | 70   | 46.37 | -0.804 | 69  | 0.564 | -0.493 | 69  | 0.135 | -0.410 | 69  | 0.386  | 0.066  | 70  | 3.533   | -0.597 |   |
| 384      | TJ_Jiang             | 44     | 52.01 | -0.085 | 73           | -0.025 | 65  | 0.035  | 58   | 32  | 34.29  | -0.135   | 33   | 77.84 | 0.333  | 32  | 0.570 | 0.141  | 32  | 0.115 | -0.063 | 32  | 0.340  | -0.090 | 33  | 3.298   | 0.025  |   |
| 007s     | FFASstandard         | 123    | 57.77 | 0.011  | 63           | -0.029 | 66  | -0.069 | 72   | 111 | 41.09  | 0.130    | 98   | 71.85 | 0.060  | 97  | 0.614 | 0.060  | 97  | 0.189 | 0.338  | 97  | 0.331  | -0.594 | 98  | 3.452   | -0.406 |   |
| 186s     | Poing                | 124    | 56.45 | -0.124 | 77           | -0.029 | 67  | 0.065  | 54   | 114 | 39.21  | -0.068   | 94   | 63.45 | -0.215 | 93  | 0.619 | 0.059  | 93  | 0.148 | -0.270 | 93  | 0.429  | 0.735  | 94  | 3.181   | 0.149  |   |
| 23       | PS2-manual           | 47     | 52.19 | 0.076  | 53           | -0.050 | 68  | -0.175 | 85   | 34  | 32.80  | -0.209   | 34   | 80.89 | 0.443  | 33  | 0.578 | 0.172  | 33  | 0.110 | -0.250 | 33  | 0.285  | -0.836 | 34  | 3.498   | -0.373 |   |
| 385s     | PSI                  | 92     | 58.98 | 0.069  | 55           | -0.051 | 69  | -0.170 | 83   | 87  | 39.84  | -0.315   | 73   | 84.54 | 0.466  | 72  | 0.655 | 0.196  | 72  | 0.155 | -0.212 | 72  | 0.318  | -0.788 | 73  | 3.418   | -0.366 |   |
| 154s     | HHpred2              | 126    | 57.15 | -0.108 | 75           | -0.057 | 70  | -0.007 | 62   | 112 | 38.52  | -0.352   | 98   | 86.59 | 0.567  | 97  | 0.640 | 0.318  | 97  | 0.169 | 0.107  | 97  | 0.334  | -0.539 | 98  | 3.323   | -0.142 |   |
| 135s     | pipe_int             | 111    | 57.82 | -0.048 | 68           | -0.059 | 71  | -0.069 | 73   | 101 | 41.43  | 0.159    | 87   | 50.68 | -0.703 | 79  | 0.667 | 0.287  | 86  | 0.204 | 0.546  | 86  | 0.375  | -0.045 | 87  | 3.547   | -0.659 |   |
| 297s     | GeneSilicoMetaServer | 120    | 58.24 | 0.044  | 57           | -0.065 | 72  | -0.175 | 84   | 108 | 41.21  | 0.132    | 98   | 74.43 | 0.155  | 97  | 0.600 | -0.062 | 97  | 0.172 | 0.018  | 97  | 0.326  | -0.647 | 98  | 3.573   | -0.645 |   |
| 153s     | GS-MetaServer2       | 121    | 57.88 | 0.020  | 60           | -0.071 | 73  | -0.161 | 82   | 109 | 41.11  | 0.112    | 97   | 76.05 | 0.207  | 96  | 0.598 | -0.050 | 96  | 0.170 | 0.013  | 96  | 0.328  | -0.624 | 97  | 3.559   | -0.625 |   |
| 142s     | FFASsuboptimal       | 123    | 57.06 | -0.116 | 76           | -0.072 | 74  | -0.028 | 66   | 111 | 41.39  | 0.175    | 97   | 70.06 | -0.009 | 96  | 0.610 | 0.038  | 96  | 0.197 | 0.445  | 96  | 0.344  | -0.392 | 97  | 3.472   | -0.427 |   |
| 449s     | 3D-JIGSAW_V3         | 112    | 56.96 | -0.280 | 87           | -0.079 | 75  | 0.123  | 45   | 100 | 40.99  | -0.040   | 90   | 67.81 | -0.097 | 89  | 0.587 | -0.312 | 89  | 0.150 | -0.228 | 89  | 0.441  | 0.845  | 90  | 2.977   | 0.570  |   |
| 409s     | pro-sp3-TASSER       | 130    | 59.21 | 0.377  | 23           | -0.080 | 76  | -0.537 | 106  | 116 | 40.37  | 0.151    | 101  | 0.79  | -2.452 | 100 | 0.544 | -0.518 | 100 | 0.126 | -0.394 | 100 | 0.405  | 0.440  | 101 | 3.490   | -0.448 |   |
| 369      | Jiang_Zhu            | 43     | 50.51 | -0.207 | 80           | -0.097 | 77  | 0.012  | 60   | 31  | 33.62  | -0.054   | 30   | 48.54 | -0.590 | 30  | 0.581 | 0.141  | 30  | 0.167 | 0.617  | 29  | 0.364  | 0.188  | 30  | 3.429   | -0.229 |   |
| 193s     | CpHModels            | 116    | 54.66 | -0.583 | 98           | -0.101 | 78  | 0.380  | 27   | 106 | 42.47  | 0.338    | 92   | 83.73 | 0.461  | 91  | 0.613 | 0.020  | 91  | 0.211 | 0.664  | 91  | 0.378  | 0.028  | 92  | 2.877   | 0.773  |   |
| 325      | Bilab-UT             | 41     | 49.69 | -0.411 | 95           | -0.104 | 79  | 0.203  | 38   | 30  | 33.23  | -0.136   | 32   | 81.45 | 0.458  | 31  | 0.553 | -0.002 | 31  | 0.101 | -0.311 | 32  | 0.403  | 0.786  | 32  | 3.107   | 0.423  |   |
| 39       | PRI-Yang-KiharA      | 27     | 53.02 | -0.516 | 96           | -0.108 | 80  | 0.299  | 33   | 19  | 36.99  | -0.136   | 21   | 83.99 | 0.451  | 20  | 0.587 | -0.232 | 20  | 0.156 | 0.258  | 20  | 0.438  | 0.886  | 21  | 2.893   | 0.567  |   |
| 296s     | 3D-JIGSAW_AEP        | 116    | 55.66 | -0.407 | 94           | -0.144 | 81  | 0.118  | 46   | 104 | 39.99  | -0.149   | 93   | 66.83 | -0.123 | 92  | 0.573 | -0.338 | 92  | 0.154 | -0.144 | 92  | 0.441  | 0.843  | 93  | 2.949   | 0.620  |   |
| 396s     | circle               | 125    | 56.66 | -0.087 | 74           | -0.153 | 82  | -0.220 | 89   | 113 | 40.45  | 0.100    | 98   | 71.35 | 0.049  | 97  | 0.559 | -0.466 | 97  | 0.158 | -0.174 | 97  | 0.368  | -0.093 | 98  | 3.611   | -0.735 |   |
| 208      | MidwayFolding        | 36     | 50.42 | -0.084 | 72           | -0.173 | 83  | -0.262 | 93   | 29  | 31.11  | -0.416   | 29   | 69.92 | 0.118  | 28  | 0.564 | 0.253  | 28  | 0.095 | -0.252 | 28  | 0.292  | -0.744 | 29  | 3.563   | -0.531 |   |
| 495s     | BioSerf              | 111    | 57.16 | -0.210 | 81           | -0.205 | 84  | -0.199 | 88   | 101 | 38.53  | -0.477   | 90   | 74.51 | 0.137  | 89  | 0.654 | 0.241  | 89  | 0.175 | 0.070  | 88  | 0.340  | -0.585 | 90  | 3.518   | -0.583 |   |
| 172      | FrankensteinLong     | 69     | 56.68 | -0.177 | 78           | -0.213 | 85  | -0.250 | 92   | 58  | 37.00  | -0.536   | 57   | 83.65 | 0.419  | 56  | 0.596 | -0.092 | 56  | 0.148 | -0.080 | 56  | 0.316  | -0.760 | 57  | 3.443   | -0.449 |   |
| 337      | EB_AMU_Physics       | 111    | 55.86 | -0.350 | 90           | -0.214 | 86  | -0.078 | 75   | 98  | 38.12  | -0.488   | 85   | 87.07 | 0.571  | 84  | 0.632 | 0.142  | 84  | 0.165 | -0.026 | 84  | 0.322  | -0.723 | 85  | 3.217   | 0.059  |   |
| 340      | ABlpro               | 122    | 57.12 | -0.068 | 70           | -0.217 | 87  | -0.365 | 103  | 112 | 37.63  | -0.443   | 94   | 71.72 | 0.048  | 93  | 0.638 | 0.181  | 93  | 0.141 | -0.272 | 93  | 0.318  | -0.821 | 94  | 3.665   | -0.883 |   |
| 207      | POEM                 | 34     | 51.30 | -0.265 | 85           | -0.222 | 88  | -0.180 | 86   | 24  | 33.58  | -0.211   | 25   | 88.85 | 0.687  | 25  | 0.604 | 0.299  | 25  | 0.118 | -0.096 | 24  | 0.305  | -0.751 | 25  | 3.823   | -1.007 |   |
| 394s     | Fiser-M4T            | 79     | 59.76 | -0.369 | 91           | -0.254 | 89  | -0.138 | 80   | 76  | 43.60  | -0.180   | 64   | 84.03 | 0.425  | 64  | 0.656 | -0.089 | 64  | 0.193 | -0.046 | 63  | 0.334  | -0.811 | 64  | 3.266   | -0.128 |   |
| 316s     | forecast             | 95     | 56.42 | -0.273 | 86           | -0.260 | 90  | -0.247 | 91   | 88  | 38.10  | -0.630   | 78   | 85.67 | 0.500  | 78  | 0.614 | -0.112 | 78  | 0.166 | -0.073 | 77  | 0.325  | -0.779 | 78  | 3.443   | -0.391 |   |
| 70       | fleil                | 39     | 51.28 | -0.295 | 88           | -0.271 | 91  | -0.247 | 90   | 28  | 30.88  | -0.683   | 30   | 85.56 | 0.583  | 29  | 0.517 | -0.307 | 29  | 0.113 | -0.192 | 29  | 0.302  | -0.641 | 30  | 3.398   | -0.243 |   |
| 475      | AMU-Biology          | 107    | 56.63 | -0.247 | 83           | -0.292 | 92  | -0.336 | 100  | 95  | 38.38  | -0.512   | 84   | 76.93 | 0.209  | 83  | 0.604 | -0.168 | 83  | 0.148 | -0.244 | 83  | 0.331  | -0.664 | 84  | 3.541   | -0.638 |   |
| 166s     | FEIG                 | 120    | 58.39 | 0.126  | 50           | -0.292 | 93  | -0.710 | 111  | 108 | 39.21  | -0.222   | 96   | 36.29 | -1.165 | 95  | 0.534 | -0.684 | 95  | 0.137 | -0.344 | 95  | 0.341  | -0.427 | 96  | 3.946   | -1.415 |   |
| 454s     | LOOPP_Server         | 100    | 55.59 | -0.401 | 93           | -0.293 | 94  | -0.185 | 87   | 89  | 38.70  | -0.407   | 78   | 85.15 | 0.464  | 77  | 0.637 | 0.048  | 77  | 0.164 | -0.099 | 77  | 0.316  | -0.850 | 78  | 3.347   | -0.266 |   |
| 479s     | RBO-Proteus          | 25     | 48.41 | -1.361 | 108          | -0.302 | 95  | 0.756  | 6    | 13  | 29.14  | -1.208   | 18   | 99.73 | 0.973  | 17  | 0.621 | 0.357  | 17  | 0.113 | 0.063  | 17  | 0.420  | 0.806  | 18  | 1.072   | 3.548  |   |
| 387      | Jones-UCL            | 127    | 57.12 | 0.071  | 54           | -0.323 | 96  | -0.717 | 112  | 114 | 36.84  | -0.597   | 100  | 56.15 | -0.458 | 99  | 0.500 | -0.870 | 99  | 0.118 | -0.618 | 99  | 0.297  | -1.028 | 100 | 3.627   | -0.732 |   |
| 085s     | Frankenstein         | 105    | 55.10 | -0.341 | 89           | -0.334 | 97  | -0.326 | 99   | 92  | 36.32  | -0.618</ |      |       |        |     |       |        |     |       |        |     |        |        |     |         |        |   |

| group ID | group name     | GDT-HA |       |        |      | 6full+GDT-HA |      |        |      | 6full |       |        |    | GDC-sc |        |    | MCRS  |        |    | HBmc  |        |    | HBsc  |        |    | corRot |        |   | MPscore |   |  |
|----------|----------------|--------|-------|--------|------|--------------|------|--------|------|-------|-------|--------|----|--------|--------|----|-------|--------|----|-------|--------|----|-------|--------|----|--------|--------|---|---------|---|--|
|          |                | n      | raw   | Z      | rank | Z            | rank | Z      | rank | n     | raw   | Z      | n  | raw    | Z      | n  | raw   | Z      | n  | raw   | Z      | n  | raw   | Z      | n  | raw    | Z      | n | raw     | Z |  |
| 157s     | 3Dpro          | 108    | 55.77 | -0.545 | 97   | -0.457       | 101  | -0.369 | 104  | 97    | 37.28 | -0.790 | 88 | 82.91  | 0.397  | 88 | 0.577 | -0.449 | 88 | 0.163 | -0.136 | 87 | 0.321 | -0.796 | 88 | 3.444  | -0.440 |   |         |   |  |
| 113      | Softberry      | 40     | 49.18 | -0.639 | 100  | -0.458       | 102  | -0.277 | 94   | 29    | 32.44 | -0.583 | 27 | 50.03  | -0.660 | 26 | 0.562 | -0.156 | 26 | 0.126 | 0.072  | 25 | 0.337 | -0.242 | 27 | 3.319  | -0.094 |   |         |   |  |
| 318s     | panther_server | 107    | 54.53 | -0.660 | 101  | -0.469       | 103  | -0.279 | 95   | 101   | 38.60 | -0.487 | 86 | 56.71  | -0.491 | 86 | 0.549 | -0.720 | 86 | 0.216 | 0.662  | 85 | 0.321 | -0.835 | 86 | 3.156  | 0.197  |   |         |   |  |
| 002s     | ACOMPMOD       | 96     | 52.86 | -0.789 | 103  | -0.592       | 104  | -0.395 | 105  | 88    | 35.28 | -0.894 | 78 | 87.13  | 0.538  | 77 | 0.588 | -0.353 | 77 | 0.139 | -0.417 | 77 | 0.314 | -0.938 | 78 | 3.366  | -0.307 |   |         |   |  |
| 427s     | 3DShot2        | 121    | 53.62 | -0.586 | 99   | -0.696       | 105  | -0.807 | 113  | 108   | 36.65 | -0.622 | 98 | 36.51  | -1.152 | 97 | 0.527 | -0.691 | 97 | 0.109 | -0.694 | 97 | 0.345 | -0.408 | 98 | 3.882  | -1.273 |   |         |   |  |
| 493      | Kolinski       | 44     | 47.93 | -0.786 | 102  | -0.836       | 106  | -0.886 | 114  | 32    | 30.66 | -0.830 | 32 | 14.59  | -1.951 | 31 | 0.425 | -1.288 | 31 | 0.079 | -0.520 | 31 | 0.336 | -0.308 | 32 | 3.502  | -0.421 |   |         |   |  |
| 164s     | FOLDpro        | 85     | 50.82 | -1.172 | 107  | -0.896       | 107  | -0.620 | 110  | 74    | 31.40 | -1.497 | 71 | 84.05  | 0.431  | 70 | 0.509 | -0.868 | 70 | 0.127 | -0.456 | 70 | 0.306 | -0.917 | 71 | 3.423  | -0.416 |   |         |   |  |
| 462s     | MUFOLD-Server  | 85     | 55.27 | -0.978 | 106  | -1.010       | 108  | -1.041 | 116  | 75    | 37.63 | -1.031 | 65 | 1.22   | -2.596 | 65 | 0.525 | -1.109 | 65 | 0.119 | -0.768 | 64 | 0.415 | 0.312  | 65 | 3.687  | -1.058 |   |         |   |  |
| 095s     | rehtnap        | 77     | 52.16 | -1.493 | 110  | -1.023       | 109  | -0.553 | 107  | 72    | 38.14 | -0.981 | 62 | 63.40  | -0.341 | 62 | 0.525 | -1.148 | 62 | 0.213 | 0.386  | 61 | 0.299 | -1.285 | 62 | 3.159  | 0.053  |   |         |   |  |
| 463      | xianmingpan    | 87     | 50.93 | -1.850 | 111  | -1.103       | 110  | -0.357 | 101  | 80    | 37.00 | -1.337 | 68 | 67.58  | -0.224 | 67 | 0.548 | -1.124 | 67 | 0.190 | 0.028  | 67 | 0.311 | -1.124 | 68 | 2.387  | 1.640  |   |         |   |  |
| 183      | StruPPi        | 26     | 47.10 | -1.464 | 109  | -1.393       | 111  | -1.321 | 117  | 18    | 28.52 | -1.539 | 21 | 48.28  | -0.809 | 20 | 0.396 | -1.763 | 20 | 0.099 | -0.444 | 20 | 0.220 | -1.745 | 21 | 4.084  | -1.628 |   |         |   |  |
| 073s     | Distill        | 83     | 49.94 | -2.042 | 112  | -1.806       | 112  | -1.570 | 119  | 77    | 32.36 | -2.053 | 62 | 0.52   | -2.619 | 62 | 0.371 | -2.460 | 62 | 0.090 | -1.296 | 61 | 0.388 | -0.178 | 62 | 3.553  | -0.814 |   |         |   |  |
| 14       | SMEG-CCP       | 104    | 46.52 | -2.106 | 113  | -2.256       | 113  | -2.405 | 120  | 92    | 31.41 | -1.993 | 83 | 16.15  | -1.973 | 82 | 0.128 | -4.559 | 82 | 0.049 | -1.704 | 82 | 0.230 | -2.112 | 83 | 4.225  | -2.089 |   |         |   |  |

Only groups with at least 20 qualifying models are included, here and in the main text.

(A qualifying model is the best model by GDT-TS of the up to 5 submissions for a given target by a group, and must have GDT-HA > 33.)

n: number of models considered per group

raw: average raw score over all qualifying models per group

Z: average Z-score over all qualifying models per group

rank: simple group ranking based on average Z-score across qualifying groups

MCRS = mainchain "reality" score: all-atom clashes, Ramachandran outliers, bond length or angle outliers for backbone

MPscore = MolProbity score: all-atom clashes, Ramachandran and rotamer outliers (scaled) for whole model

HBmc = fraction of target mainchain Hbonds matched in model

HBsc = fraction of target sidechain Hbonds matched in model

GDC-sc = GDT-style score for atom at end of each sidechain except Gly or Ala, 0.5 to 5Å limits (by LGA program)

corRot = fraction of target sidechain rotamers matched by model (all chi angles)

6full = average of all 6 full-model-measure Z-scores; over all best models with GDT-HA > 33

6full+GDT-HA = average of (1) by-domain, best-model GDT-HA Z-score and (2) average of 6 full-model-measure Z-scores
